# Supplementary material for: Predicting position along a looping immune response trajectory
Source: PLoS One. 2018 Oct 8;13(10):e0200147. doi: 10.1371/journal.pone.0200147 (PMC6175499; doi:10.1371/journal.pone.0200147)
Supplement: S1 Table — (XLSX) [file pone.0200147.s001.xlsx]

## Sheet: Sheet1
Gene 1	Gene 2	Prediction accuracy
IL1A	TNIP3	0.9375
IL1A	EBI3	0.90625
IL1A	MCOLN2	0.8437
IL1A	IL7R	0.8125
IL6	CD274	0.8125
IL6	EBI3	0.78125
